# Supplementary material for: Thorium copper phosphides: more diverse metal–phosphorus and phosphorus–phosphorus interactions than U analogues
Source: Royal Society of Chemistry journal article supplement (doi:10.1039/c7dt02145c), 2017-01-01
Supplement: c7dt02145c1.pdf [file c7dt02145c1.pdf]

## **Thorium Copper Phosphides: More Diverse Metal–Phosphorus and Phosphorus–Phosphorus Interactions than U analogues**

Geng Bang Jin,<sup>\*,†</sup> Christos D. Malliakas,<sup>†,‡</sup> and Jian Lin<sup>†,§</sup>

<sup>†</sup>*Chemical Sciences and Engineering Division, Argonne National Laboratory, Argonne, Illinois  
60439, United States*

<sup>‡</sup>*Department of Chemistry, Northwestern University, Evanston, Illinois, 60208-3113, United  
States*

<sup>§</sup>*Present address: Shanghai Institute of Applied Physics, Chinese Academy of Sciences, Shanghai  
201800, China*

### **Supplementary Information**

**Figure S1.** Powder X-ray diffraction patterns of black products from Th/Cu/P/CuI reactions. a).  $\text{ThCuP}_2$  synthesized at 923 K; b).  $\beta\text{-ThCu}_2\text{P}_2$  and  $\text{ThCu}_5\text{P}_3$  synthesized at 923 K; c).  $\text{ThCu}_5\text{P}_3$  synthesized at 1073 K; d) and e) Reaction of Th, Cu, and P in a molar ratio of 1:2:2 without CuI at 923 K for 8 days.

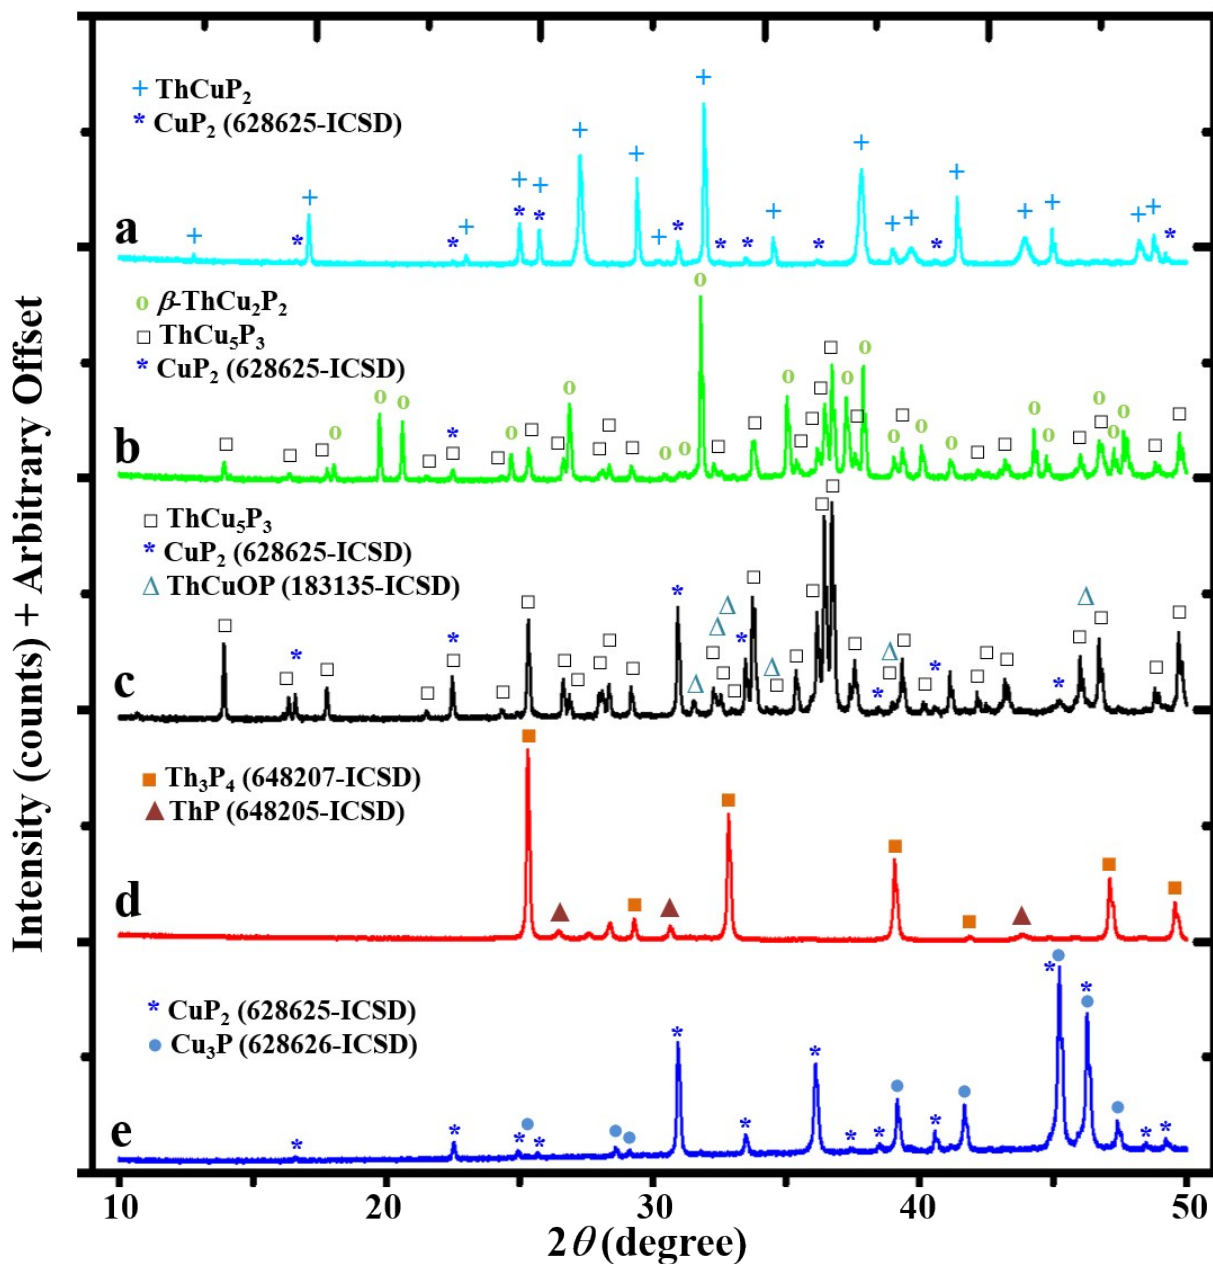

**Figure S2.** Synthesized  $hkl$  precession images in APEX2 from diffraction frames of a crystal of  $\text{ThCuP}_2$ .

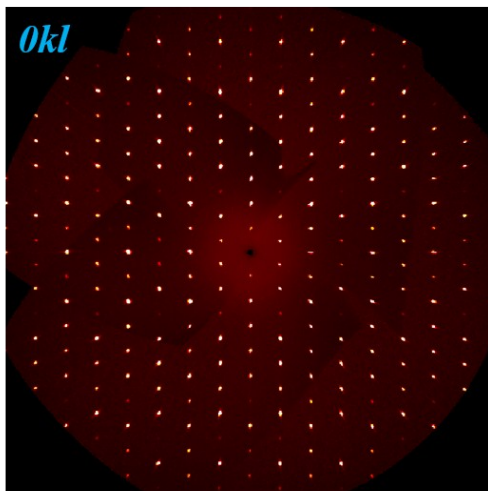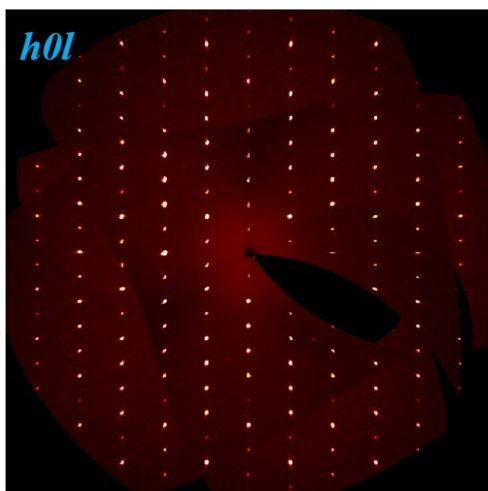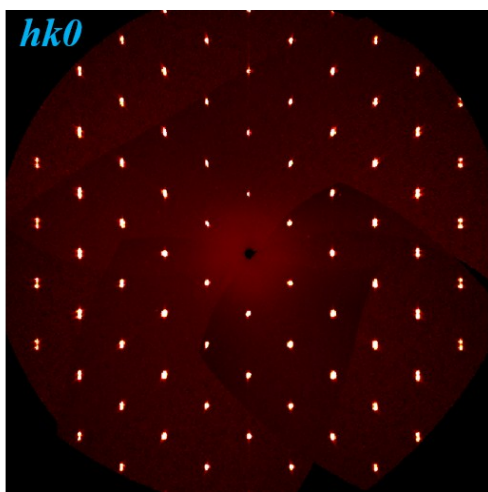

**Figure S3.** Synthesized  $hkl$  precession images simulated in APEX2 from diffraction frames of a crystal of  $\text{ThCu}_5\text{P}_3$ .

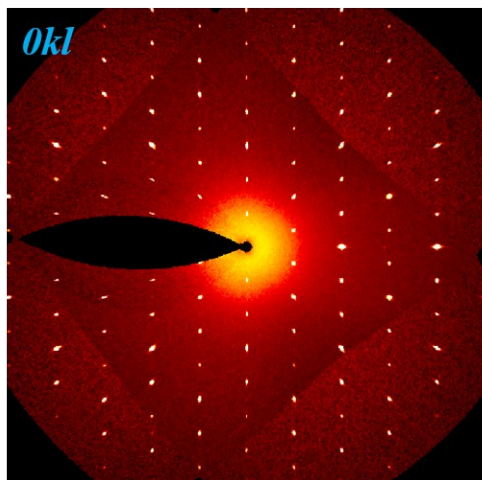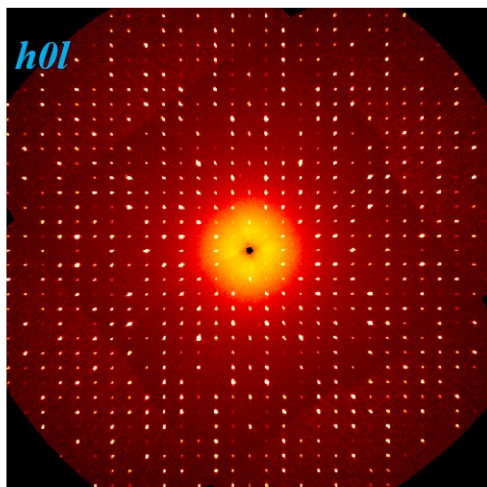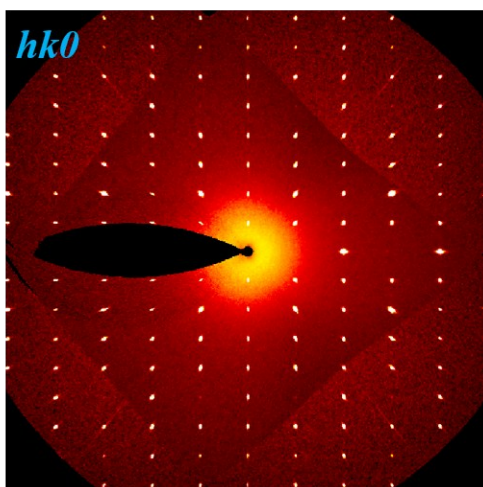

**Figure S4.** Solid products from reaction of Th, Cu, and P in a molar ratio of 1:2:2 at 923 K for 8 days.

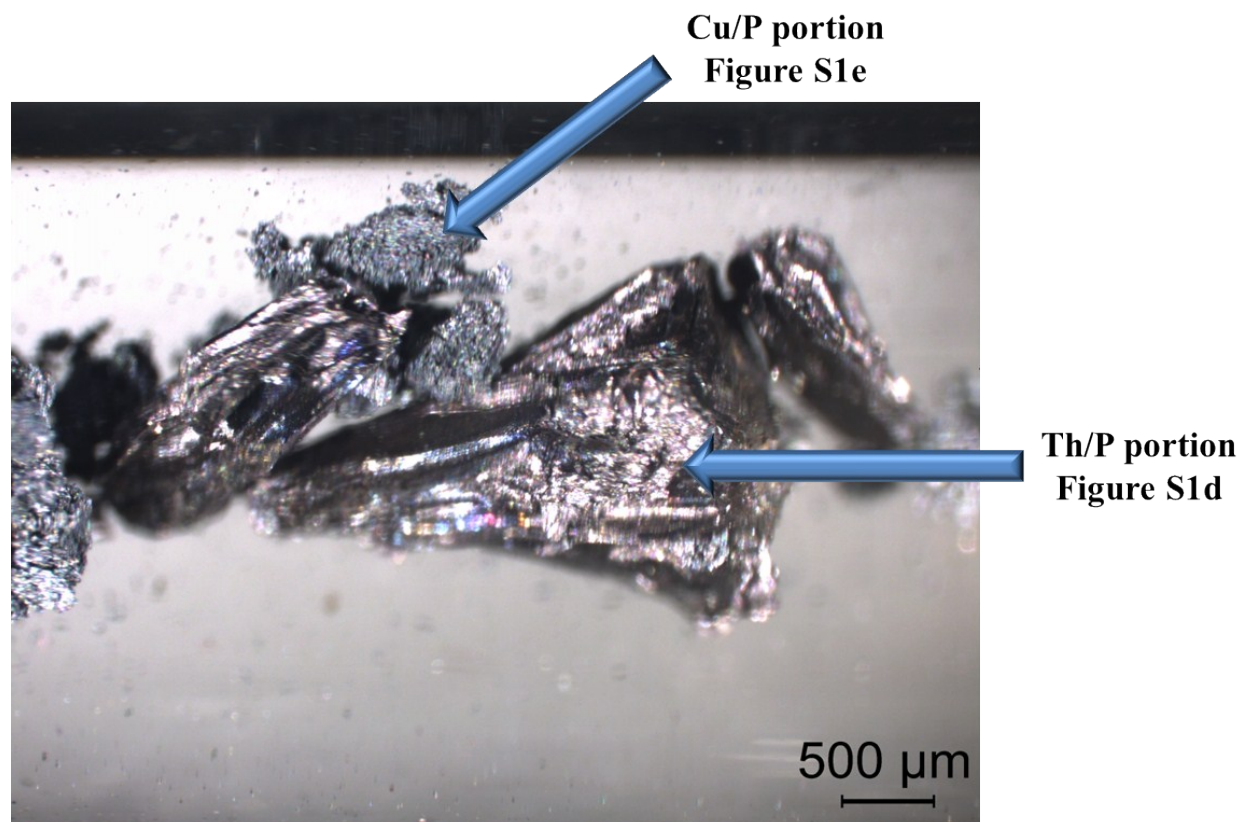

**Table S1.** Atomic coordinates ( $\times 10^4$ ) and equivalent isotropic displacement parameters ( $\text{\AA}^2 \times 10^3$ ) for ThCuP<sub>2</sub>.  $U_{\text{eq}}$  is defined as one third of the trace of the orthogonalized  $U_{ij}$  tensor.

|       |      | $x$    | $y$     | $z$     | $U_{\text{eq}}$ |
|-------|------|--------|---------|---------|-----------------|
| Th(1) |      | 0      | 0       | 3526(1) | 7(1)            |
| Cu(1) |      | 0      | 0       | 1180(1) | 9(1)            |
| P(1)  |      | 655(8) | 3044(6) | 0       | 8(1)            |
| P(2)  | 5000 | 0      | 2034(2) | 8(1)    |                 |

**Table S2.** Atomic coordinates ( $\times 10^4$ ) and equivalent isotropic displacement parameters ( $\text{\AA}^2 \times 10^3$ ) for  $\beta$ -ThCu<sub>2</sub>P<sub>2</sub>.  $U_{\text{eq}}$  is defined as one third of the trace of the orthogonalized  $U_{ij}$  tensor.

|       |  | $x$     | $y$  | $z$     | $U_{\text{eq}}$ |
|-------|--|---------|------|---------|-----------------|
| Th(1) |  | 2503(1) | 2500 | 3136(1) | 6(1)            |
| Cu(1) |  | 563(1)  | 2500 | 5957(1) | 7(1)            |
| Cu(2) |  | 696(1)  | 2500 | 476(1)  | 7(1)            |
| P(1)  |  | 3243(1) | 2500 | 248(1)  | 7(1)            |
| P(2)  |  | 4750(1) | 2500 | 6821(1) | 7(1)            |

**Table S3.** Atomic coordinates ( $\times 10^4$ ) and equivalent isotropic displacement parameters ( $\text{\AA}^2 \times 10^3$ ) for  $\text{ThCu}_5\text{P}_3$ .  $U_{\text{eq}}$  is defined as one third of the trace of the orthogonalized  $U_{ij}$  tensor.

|        | $x$     | $y$  | $z$      | $U_{\text{eq}}$ |
|--------|---------|------|----------|-----------------|
| Th(1)  | 2910(1) | 2500 | 764(1)   | 3(1)            |
| Cu(1)  | 24(1)   | 2500 | 5937(1)  | 6(1)            |
| Cu(2)  | 3136(1) | 2500 | 3641(1)  | 6(1)            |
| Cu(3)  | 3238(1) | 2500 | 7826(1)  | 6(1)            |
| Cu(4)  | 5604(1) | 2500 | 5424(1)  | 5(1)            |
| Cu(5A) | 459(4)  | 2500 | 2000(4)  | 13(2)           |
| Cu(5B) | 260(20) | 2500 | 2114(16) | 63(4)           |
| P(1)   | 1130(1) | 2500 | 4030(1)  | 5(1)            |
| P(2)   | 1326(1) | 2500 | 7567(1)  | 4(1)            |
| P(3)   | 3781(1) | 2500 | 5735(1)  | 4(1)            |
